# Supplementary material for: Combinatorial chemistry of oxynitride phosphors and discovery of a novel phosphor for use in light emitting diodes, Ca1.5Ba0.5Si5N6O3:Eu2+
Source: Royal Society of Chemistry journal article supplement (doi:10.1039/c2tc00731b), 2013-01-01
Supplement: c2tc00731b.pdf [file c2tc00731b.pdf]

## 1<sup>st</sup> Swarm

|           | CaO           | SrO           | BaO           | SiN <sub>4/3</sub> | EuO <sub>3/2</sub> | Intensity     | Correction factor |
|-----------|---------------|---------------|---------------|--------------------|--------------------|---------------|-------------------|
| <b>1</b>  | <b>0.0322</b> | <b>0.1958</b> | <b>0.1325</b> | <b>0.6246</b>      | <b>0.0150</b>      | <b>14435</b>  | <b>2</b>          |
| <b>2</b>  | <b>0.3006</b> | <b>0.0252</b> | <b>0.0282</b> | <b>0.6312</b>      | <b>0.0148</b>      | <b>12269</b>  | <b>1.5</b>        |
| <b>3</b>  | <b>0.0001</b> | <b>0.2665</b> | <b>0.0027</b> | <b>0.7194</b>      | <b>0.0112</b>      | <b>16274</b>  | <b>2</b>          |
| <b>4</b>  | <b>0.2211</b> | <b>0.0664</b> | <b>0.0320</b> | <b>0.6673</b>      | <b>0.0133</b>      | <b>11806</b>  | <b>1</b>          |
| <b>5</b>  | <b>0.0158</b> | <b>0.1953</b> | <b>0.0847</b> | <b>0.6919</b>      | <b>0.0123</b>      | <b>15173</b>  | <b>2</b>          |
| <b>6</b>  | <b>0.0015</b> | <b>0.0409</b> | <b>0.2041</b> | <b>0.7432</b>      | <b>0.0103</b>      | <b>3433.2</b> | <b>2</b>          |
| <b>7</b>  | <b>0.1019</b> | <b>0.1516</b> | <b>0.0287</b> | <b>0.7060</b>      | <b>0.0118</b>      | <b>16066</b>  | <b>2</b>          |
| <b>8</b>  | <b>0.1539</b> | <b>0.1513</b> | <b>0.0415</b> | <b>0.6389</b>      | <b>0.0144</b>      | <b>15972</b>  | <b>1.5</b>        |
| <b>9</b>  | <b>0.1776</b> | <b>0.0801</b> | <b>0.0846</b> | <b>0.6435</b>      | <b>0.0143</b>      | <b>11968</b>  | <b>1</b>          |
| <b>10</b> | <b>0.1452</b> | <b>0.0794</b> | <b>0.1580</b> | <b>0.6015</b>      | <b>0.0159</b>      | <b>10393</b>  | <b>1</b>          |
| <b>11</b> | <b>0.0668</b> | <b>0.1900</b> | <b>0.0382</b> | <b>0.6927</b>      | <b>0.0123</b>      | <b>17430</b>  | <b>2</b>          |
| <b>12</b> | <b>0.0260</b> | <b>0.2762</b> | <b>0.0772</b> | <b>0.6048</b>      | <b>0.0158</b>      | <b>14790</b>  | <b>2</b>          |
| <b>13</b> | <b>0.0224</b> | <b>0.1852</b> | <b>0.1165</b> | <b>0.6625</b>      | <b>0.0135</b>      | <b>13977</b>  | <b>2</b>          |
| <b>14</b> | <b>0.1395</b> | <b>0.0343</b> | <b>0.0989</b> | <b>0.7159</b>      | <b>0.0114</b>      | <b>12610</b>  | <b>1.5</b>        |
| <b>15</b> | <b>0.0539</b> | <b>0.1298</b> | <b>0.1428</b> | <b>0.6598</b>      | <b>0.0136</b>      | <b>15774</b>  | <b>2</b>          |
| <b>16</b> | <b>0.2669</b> | <b>0.0467</b> | <b>0.0439</b> | <b>0.6276</b>      | <b>0.0149</b>      | <b>11129</b>  | <b>1</b>          |
| <b>17</b> | <b>0.2036</b> | <b>0.0380</b> | <b>0.0814</b> | <b>0.6636</b>      | <b>0.0135</b>      | <b>11301</b>  | <b>1</b>          |
| <b>18</b> | <b>0.0934</b> | <b>0.0448</b> | <b>0.1605</b> | <b>0.6888</b>      | <b>0.0124</b>      | <b>9078.4</b> | <b>2</b>          |

## 2<sup>nd</sup> Swarm

|           | CaO    | SrO    | BaO    | SiN <sub>4/3</sub> | EuO <sub>3/2</sub> | Intensity     | Correction factor |
|-----------|--------|--------|--------|--------------------|--------------------|---------------|-------------------|
| <i>1</i>  | 0.2022 | 0.0528 | 0.0718 | 0.6596             | 0.0136             | <i>11365</i>  | 1                 |
| <i>2</i>  | 0.2602 | 0.0345 | 0.0437 | 0.6475             | 0.0141             | <i>11290</i>  | 1.5               |
| <i>3</i>  | 0.2135 | 0.0000 | 0.1114 | 0.6615             | 0.0135             | <i>9940.3</i> | 1                 |
| <i>4</i>  | 0.1294 | 0.0727 | 0.1185 | 0.6661             | 0.0134             | <i>14483</i>  | 1.5               |
| <i>5</i>  | 0.3050 | 0.0591 | 0.0200 | 0.6000             | 0.0160             | <i>4731</i>   | 2                 |
| <i>6</i>  | 0.1795 | 0.0031 | 0.2014 | 0.6000             | 0.0160             | <i>9813.8</i> | 1                 |
| <i>7</i>  | 0.1478 | 0.1364 | 0.0256 | 0.6773             | 0.0129             | <i>12351</i>  | 1.5               |
| <i>8</i>  | 0.1527 | 0.0526 | 0.1259 | 0.6549             | 0.0138             | <i>2974.8</i> | 1                 |
| <i>9</i>  | 0.1786 | 0.0757 | 0.0837 | 0.6478             | 0.0141             | <i>6735.1</i> | 1                 |
| <i>10</i> | 0.2082 | 0.0509 | 0.1052 | 0.6205             | 0.0152             | <i>13409</i>  | 1.5               |
| <i>11</i> | 0.2215 | 0.0872 | 0.0699 | 0.6056             | 0.0158             | <i>13605</i>  | 2                 |
| <i>12</i> | 0.1554 | 0.1289 | 0.0441 | 0.6580             | 0.0137             | <i>12897</i>  | 1.5               |
| <i>13</i> | 0.2915 | 0.0000 | 0.0462 | 0.6482             | 0.0141             | <i>11855</i>  | 1.5               |
| <i>14</i> | 0.2070 | 0.0765 | 0.1005 | 0.6000             | 0.0160             | <i>7168.2</i> | 1.5               |
| <i>15</i> | 0.1785 | 0.0588 | 0.0855 | 0.6638             | 0.0134             | <i>12159</i>  | 2                 |
| <i>16</i> | 0.1956 | 0.0728 | 0.0877 | 0.6291             | 0.0148             | <i>14982</i>  | 1.5               |
| <i>17</i> | 0.1800 | 0.0675 | 0.0906 | 0.6478             | 0.0141             | <i>13744</i>  | 1.5               |
| <i>18</i> | 0.1372 | 0.1075 | 0.0887 | 0.6528             | 0.0139             | <i>15070</i>  | 1.5               |

### 3<sup>rd</sup> Swarm

|           | CaO           | SrO           | BaO           | SiN <sub>4/3</sub> | EuO <sub>3/2</sub> | Intensity     | Correction factor |
|-----------|---------------|---------------|---------------|--------------------|--------------------|---------------|-------------------|
| <b>1</b>  | <b>0.2022</b> | <b>0.0528</b> | <b>0.0718</b> | <b>0.6596</b>      | <b>0.0136</b>      | <b>13166</b>  | <b>1.5</b>        |
| <b>2</b>  | <b>0.2551</b> | <b>0.0255</b> | <b>0.0496</b> | <b>0.6560</b>      | <b>0.0138</b>      | <b>9027.5</b> | <b>1.5</b>        |
| <b>3</b>  | <b>0.2106</b> | <b>0.0523</b> | <b>0.0630</b> | <b>0.6605</b>      | <b>0.0136</b>      | <b>10434</b>  | <b>1.5</b>        |
| <b>4</b>  | <b>0.3067</b> | <b>0.0000</b> | <b>0.0173</b> | <b>0.6625</b>      | <b>0.0135</b>      | <b>4885.7</b> | <b>2</b>          |
| <b>5</b>  | <b>0.1518</b> | <b>0.0571</b> | <b>0.0311</b> | <b>0.7500</b>      | <b>0.0100</b>      | <b>5295.2</b> | <b>2</b>          |
| <b>6</b>  | <b>0.2484</b> | <b>0.0967</b> | <b>0.0203</b> | <b>0.6194</b>      | <b>0.0152</b>      | <b>8112.1</b> | <b>2</b>          |
| <b>7</b>  | <b>0.2010</b> | <b>0.0440</b> | <b>0.0654</b> | <b>0.6767</b>      | <b>0.0129</b>      | <b>11047</b>  | <b>1.5</b>        |
| <b>8</b>  | <b>0.1742</b> | <b>0.1634</b> | <b>0.0000</b> | <b>0.6483</b>      | <b>0.0141</b>      | <b>12156</b>  | <b>2</b>          |
| <b>9</b>  | <b>0.1848</b> | <b>0.0596</b> | <b>0.0862</b> | <b>0.6557</b>      | <b>0.0138</b>      | <b>11989</b>  | <b>1.5</b>        |
| <b>10</b> | <b>0.1980</b> | <b>0.0720</b> | <b>0.0978</b> | <b>0.6168</b>      | <b>0.0153</b>      | <b>7054.9</b> | <b>1.5</b>        |
| <b>11</b> | <b>0.0795</b> | <b>0.1401</b> | <b>0.0204</b> | <b>0.7500</b>      | <b>0.0100</b>      | <b>5464.6</b> | <b>2</b>          |
| <b>12</b> | <b>0.1694</b> | <b>0.1004</b> | <b>0.0566</b> | <b>0.6601</b>      | <b>0.0136</b>      | <b>11573</b>  | <b>2</b>          |
| <b>13</b> | <b>0.2504</b> | <b>0.0340</b> | <b>0.0446</b> | <b>0.6573</b>      | <b>0.0137</b>      | <b>10718</b>  | <b>2</b>          |
| <b>14</b> | <b>0.1532</b> | <b>0.0522</b> | <b>0.0733</b> | <b>0.7097</b>      | <b>0.0116</b>      | <b>6926.7</b> | <b>1.5</b>        |
| <b>15</b> | <b>0.0740</b> | <b>0.1193</b> | <b>0.1288</b> | <b>0.6646</b>      | <b>0.0134</b>      | <b>12157</b>  | <b>2</b>          |
| <b>16</b> | <b>0.2176</b> | <b>0.0445</b> | <b>0.0593</b> | <b>0.6651</b>      | <b>0.0134</b>      | <b>14640</b>  | <b>1</b>          |
| <b>17</b> | <b>0.1957</b> | <b>0.0406</b> | <b>0.0769</b> | <b>0.6739</b>      | <b>0.0130</b>      | <b>13899</b>  | <b>1</b>          |
| <b>18</b> | <b>0.2011</b> | <b>0.0582</b> | <b>0.0739</b> | <b>0.6529</b>      | <b>0.0139</b>      | <b>12048</b>  | <b>1</b>          |

## 4<sup>th</sup> Swarm

|           | CaO           | SrO           | BaO           | SiN <sub>4/3</sub> | EuO <sub>3/2</sub> | Intensity     | Correction factor |
|-----------|---------------|---------------|---------------|--------------------|--------------------|---------------|-------------------|
| <b>1</b>  | <b>0.2000</b> | <b>0.0542</b> | <b>0.0686</b> | <b>0.6638</b>      | <b>0.0134</b>      | <b>9801.6</b> | <b>1.5</b>        |
| <b>2</b>  | <b>0.2364</b> | <b>0.0520</b> | <b>0.0472</b> | <b>0.6504</b>      | <b>0.0140</b>      | <b>9490.7</b> | <b>1.5</b>        |
| <b>3</b>  | <b>0.2201</b> | <b>0.0006</b> | <b>0.0981</b> | <b>0.6678</b>      | <b>0.0133</b>      | <b>11692</b>  | <b>1</b>          |
| <b>4</b>  | <b>0.1703</b> | <b>0.0666</b> | <b>0.0789</b> | <b>0.6710</b>      | <b>0.0132</b>      | <b>11063</b>  | <b>1.5</b>        |
| <b>5</b>  | <b>0.2422</b> | <b>0.0928</b> | <b>0.0490</b> | <b>0.6000</b>      | <b>0.0160</b>      | <b>2701.8</b> | <b>1.5</b>        |
| <b>6</b>  | <b>0.2488</b> | <b>0.0000</b> | <b>0.1352</b> | <b>0.6000</b>      | <b>0.0160</b>      | <b>9865.7</b> | <b>1</b>          |
| <b>7</b>  | <b>0.2000</b> | <b>0.0759</b> | <b>0.0557</b> | <b>0.6546</b>      | <b>0.0138</b>      | <b>6943.9</b> | <b>1.5</b>        |
| <b>8</b>  | <b>0.1973</b> | <b>0.0400</b> | <b>0.0822</b> | <b>0.6673</b>      | <b>0.0133</b>      | <b>14159</b>  | <b>1.5</b>        |
| <b>9</b>  | <b>0.2170</b> | <b>0.0483</b> | <b>0.0649</b> | <b>0.6560</b>      | <b>0.0138</b>      | <b>11780</b>  | <b>1.5</b>        |
| <b>10</b> | <b>0.2133</b> | <b>0.0000</b> | <b>0.1067</b> | <b>0.6667</b>      | <b>0.0133</b>      | <b>13198</b>  | <b>1</b>          |
| <b>11</b> | <b>0.1874</b> | <b>0.0000</b> | <b>0.0896</b> | <b>0.7115</b>      | <b>0.0115</b>      | <b>10816</b>  | <b>1</b>          |
| <b>12</b> | <b>0.1826</b> | <b>0.0618</b> | <b>0.0741</b> | <b>0.6683</b>      | <b>0.0133</b>      | <b>13874</b>  | <b>1.5</b>        |
| <b>13</b> | <b>0.2681</b> | <b>0.0000</b> | <b>0.0555</b> | <b>0.6630</b>      | <b>0.0135</b>      | <b>9950.7</b> | <b>1</b>          |
| <b>14</b> | <b>0.1962</b> | <b>0.0285</b> | <b>0.1120</b> | <b>0.6493</b>      | <b>0.0140</b>      | <b>12537</b>  | <b>1.5</b>        |
| <b>15</b> | <b>0.1711</b> | <b>0.0659</b> | <b>0.0845</b> | <b>0.6651</b>      | <b>0.0134</b>      | <b>11953</b>  | <b>1.5</b>        |
| <b>16</b> | <b>0.2176</b> | <b>0.0445</b> | <b>0.0593</b> | <b>0.6651</b>      | <b>0.0134</b>      | <b>11853</b>  | <b>1.5</b>        |
| <b>17</b> | <b>0.2363</b> | <b>0.0377</b> | <b>0.0541</b> | <b>0.6583</b>      | <b>0.0137</b>      | <b>12428</b>  | <b>1.5</b>        |
| <b>18</b> | <b>0.2059</b> | <b>0.0459</b> | <b>0.0603</b> | <b>0.6749</b>      | <b>0.0130</b>      | <b>11021</b>  | <b>1.5</b>        |

## 5<sup>th</sup> Swarm

|           | CaO    | SrO    | BaO    | SiN <sub>4/3</sub> | EuO <sub>3/2</sub> | Intensity     | Correction factor |
|-----------|--------|--------|--------|--------------------|--------------------|---------------|-------------------|
| <b>1</b>  | 0.2045 | 0.0000 | 0.1232 | 0.6586             | 0.0137             | <i>13028</i>  | 1                 |
| <b>2</b>  | 0.2110 | 0.0032 | 0.1189 | 0.6531             | 0.0139             | <i>11768</i>  | 1.5               |
| <b>3</b>  | 0.2006 | 0.0004 | 0.1235 | 0.6621             | 0.0135             | <i>9370</i>   | 1                 |
| <b>4</b>  | 0.2338 | 0.0043 | 0.0868 | 0.6616             | 0.0135             | <i>14628</i>  | 1.5               |
| <b>5</b>  | 0.0607 | 0.0993 | 0.1000 | 0.7292             | 0.0108             | <i>8381.9</i> | 2.5               |
| <b>6</b>  | 0.2086 | 0.0005 | 0.1120 | 0.6655             | 0.0134             | <i>10921</i>  | 1                 |
| <b>7</b>  | 0.1729 | 0.0185 | 0.1120 | 0.6840             | 0.0126             | <i>12073</i>  | 1.5               |
| <b>8</b>  | 0.2151 | 0.0000 | 0.1052 | 0.6664             | 0.0133             | <i>12404</i>  | 1                 |
| <b>9</b>  | 0.2066 | 0.0273 | 0.0931 | 0.6593             | 0.0136             | <i>8960</i>   | 1.5               |
| <b>10</b> | 0.2133 | 0.0000 | 0.1067 | 0.6667             | 0.0133             | <i>12929</i>  | 1                 |
| <b>11</b> | 0.1925 | 0.0000 | 0.0920 | 0.7037             | 0.0119             | <i>12204</i>  | 1                 |
| <b>12</b> | 0.2125 | 0.0000 | 0.1087 | 0.6654             | 0.0134             | <i>13758</i>  | 1                 |
| <b>13</b> | 0.2652 | 0.0000 | 0.0549 | 0.6666             | 0.0133             | <i>8634.6</i> | 1                 |
| <b>14</b> | 0.1985 | 0.0030 | 0.1203 | 0.6648             | 0.0134             | <i>13179</i>  | 1.5               |
| <b>15</b> | 0.2262 | 0.0000 | 0.0950 | 0.6654             | 0.0134             | <i>13945</i>  | 1                 |
| <b>16</b> | 0.2115 | 0.0048 | 0.1031 | 0.6673             | 0.0133             | <i>11922</i>  | 1.5               |
| <b>17</b> | 0.1547 | 0.0608 | 0.0845 | 0.6876             | 0.0125             | <i>12963</i>  | 1.5               |
| <b>18</b> | 0.2179 | 0.0000 | 0.1351 | 0.6324             | 0.0147             | <i>12971</i>  | 1                 |
